# Supplementary material for: Can adjuncts to bowel preparation for colonoscopy improve patient experience and result in superior bowel cleanliness? A systematic review and meta-analysis
Source: PubMed Central journal article supplement (PMC7724533; doi:10.1177/2050640620953224), 2020-08-24
Supplement: sj-pdf-1-ueg-10.1177_2050640620953224.pdf [file sj-pdf-1-ueg-10.1177_2050640620953224.pdf]

## SUPPLEMENTARY FILE

---

((Bowel prep\*).ti,ab OR (colon\* prep\*).ti,ab)

AND

((adjunct\*).ti,ab OR ((flavor\*).ti,ab OR (flavour\*).ti,ab OR (diluent\*).ti,ab OR (solvent\*).ti,ab OR (add\*).ti,ab)))

AND (colonoscop\*).ti,ab"

**Supplementary Figure 1:** Search strategy

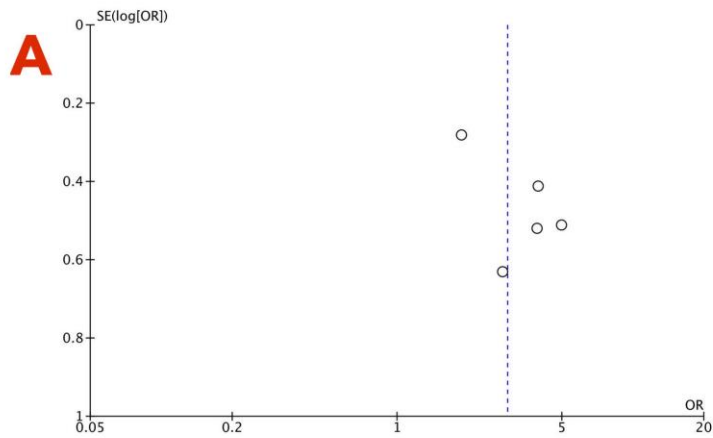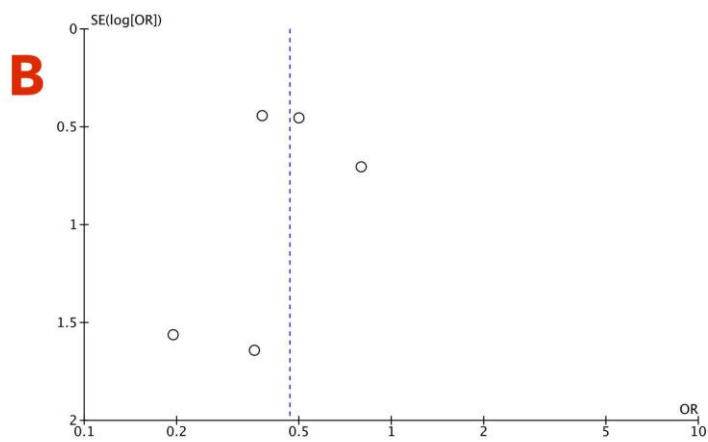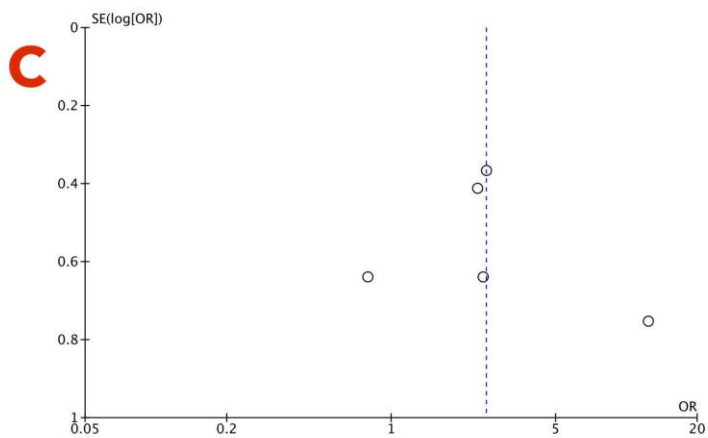

**Supplementary Figure 2:** Funnel plots of studies evaluating the outcomes of willingness to repeat bowel preparation (**Supplementary Figure 2A**), vomiting (**Supplementary Figure 2B**) and bowel preparation (**Supplementary Figure 2C**).
